# Supplementary material for: Total Energy Expenditure, Energy Intake, and Body Composition in Endurance Athletes Across the Training Season: A Systematic Review
Source: Springer Nature journal article supplement (doi:10.1186/s40798-017-0076-1), 2017-02-04
Supplement: MOESM1 [file 24442966]

**Article title:** Total Energy Expenditure, Energy Intake and Body Composition in Endurance Athletes across the Training Season: A Systematic Review.

**Authors:** Juliane Heydenreich, Bengt Kayser, Yves Schutz, Katarina Melzer

**Journal name:** Sports Medicine

**Corresponding author:** Juliane Heydenreich, Swiss Federal Institute of Sport, Hauptstrasse 247, 2532 Magglingen, Switzerland and University of Lausanne, Faculty of Biology and Medicine, Rue du Bugnon 21, 1011 Lausanne, Switzerland, e-mail: juliane.heydenreich@googlemail.com

### **Online Resource 1 – Search strategies in SPORTDiscus and MEDLINE**

*SPORTDiscus with Full Text via EBSCOHost (Date of search: January 31<sup>st</sup>, 2015)*

| #   | Query / Limiters / Expanders                                                            |
|-----|-----------------------------------------------------------------------------------------|
| S1  | endurance athletes                                                                      |
| S2  | endurance-trained                                                                       |
| S3  | endurance trained                                                                       |
| S4  | aerobically trained                                                                     |
| S5  | runners                                                                                 |
| S6  | swimmers                                                                                |
| S7  | triathletes                                                                             |
| S8  | skiers                                                                                  |
| S9  | cyclists                                                                                |
| S10 | rowers                                                                                  |
| S11 | S1 OR S2 OR S3 OR S4 OR S5 OR S6 OR S7 OR S8 OR S9 OR S10                               |
| S12 | body composition                                                                        |
| S13 | fat mass                                                                                |
| S14 | fat-mass                                                                                |
| S15 | fat free mass                                                                           |
| S16 | fat-free mass                                                                           |
| S17 | body fat                                                                                |
| S18 | metabolic rate                                                                          |
| S19 | energy expenditure                                                                      |
| S20 | dietary intake                                                                          |
| S21 | food intake                                                                             |
| S22 | energy intake                                                                           |
| S23 | food consumption                                                                        |
| S24 | macronutrient*                                                                          |
| S25 | S12 OR S13 OR S14 OR S15 OR S16 OR S17 OR S18 OR S19 OR S20 OR S21 OR S22 OR S23 OR S24 |
| S26 | S11 AND S25                                                                             |

Limiters – Published Date: 19900101-20303112; Peer Reviewed; Language: English

Search Mode – Boolean/Phrase

*MEDLINE via Pubmed (Date of search: January 31<sup>st</sup>, 2015)*

Search (((((((((endurance athletes OR endurance-trained OR endurance trained OR aerobically trained OR runners OR swimmers OR triathletes OR skiers OR cyclists OR rowers)) AND (body composition OR fat mass OR fat-mass OR fat free mass OR fat-free mass OR body fat OR metabolic rate OR energy expenditure OR dietary intake OR food intake OR energy intake OR food consumption OR macronutrient\*))) AND ("1990"[Date - Publication] : "2015/01/31"[Date - Publication])) AND Humans[Mesh]))) AND english[Language])
