# Supplementary material for: Total Energy Expenditure, Energy Intake, and Body Composition in Endurance Athletes Across the Training Season: A Systematic Review
Source: Springer Nature journal article supplement (doi:10.1186/s40798-017-0076-1), 2017-02-04
Supplement: MOESM2 [file 24442966]

**Article title:** Total Energy Expenditure, Energy Intake and Body Composition in Endurance Athletes across the Training Season: A Systematic Review.

**Authors:** Juliane Heydenreich, Bengt Kayser, Yves Schutz, Katarina Melzer

**Journal name:** Sports Medicine

**Corresponding author:** Juliane Heydenreich, Swiss Federal Institute of Sport, Hauptstrasse 247, 2532 Magglingen, Switzerland and University of Lausanne, Faculty of Biology and Medicine, Rue du Bugnon 21, 1011 Lausanne, Switzerland, e-mail: juliane.heydenreich@googlemail.com

**Online Resource 2 – Results of methodological quality assessment undertaken on included studies.**

| Reference                   | 1* | 2 | 3 | 6 | 7 | 11 | 12 | 16 | 18 | 20 | Total (/10) |
|-----------------------------|----|---|---|---|---|----|----|----|----|----|-------------|
| Armstrong et al. 2012 [1]   | Y  | Y | Y | Y | Y | U  | N  | Y  | Y  | Y  | 8           |
| Barr & Costill 1992 [2]     | Y  | Y | Y | Y | Y | U  | N  | Y  | Y  | Y  | 8           |
| Bemben et al. 2004 [3]      | Y  | Y | Y | Y | Y | U  | N  | Y  | Y  | Y  | 8           |
| Berg et al. 2008 [4]        | Y  | Y | Y | Y | Y | U  | N  | Y  | Y  | Y  | 8           |
| Bescós et al, 2012 [5]      | Y  | Y | Y | Y | Y | U  | N  | Y  | Y  | Y  | 8           |
| Boulay et al. 1994 [6]      | Y  | Y | Y | Y | Y | U  | N  | Y  | Y  | Y  | 8           |
| Brewer et al. 2013 [7]      | Y  | Y | Y | Y | Y | U  | N  | Y  | Y  | Y  | 8           |
| Brinkworth et al. 2002 [8]  | Y  | N | Y | Y | Y | U  | N  | Y  | Y  | Y  | 7           |
| Carbuhn et al. 2010 [9]     | Y  | Y | Y | Y | Y | Y  | N  | Y  | Y  | Y  | 9           |
| Costa et al. 2014 [10]      | Y  | Y | Y | Y | Y | U  | N  | Y  | Y  | Y  | 8           |
| Couzy et al. 1990 [11]      | Y  | Y | Y | Y | Y | U  | N  | Y  | Y  | Y  | 8           |
| Decombaz et al. 1992 [12]   | Y  | Y | Y | Y | Y | U  | N  | Y  | Y  | Y  | 8           |
| Dellavalle & Haas 2014 [13] | Y  | Y | Y | Y | Y | U  | N  | Y  | Y  | Y  | 8           |
| Desgorces et al. 2004 [14]  | Y  | Y | N | Y | Y | U  | N  | Y  | Y  | Y  | 7           |
| Desgorces et al. 2008 [15]  | Y  | Y | N | Y | Y | U  | N  | Y  | Y  | Y  | 7           |
| Drenowatz et al. 2012 [16]  | Y  | Y | Y | Y | Y | U  | N  | Y  | Y  | Y  | 8           |
| Drenowatz et al. 2013 [17]  | Y  | Y | Y | Y | Y | U  | N  | Y  | Y  | Y  | 8           |
| Emhoff et al. 2013 [18]     | Y  | Y | Y | Y | Y | U  | N  | Y  | Y  | Y  | 8           |

|                                     |   |   |   |   |   |   |   |   |   |   |   |
|-------------------------------------|---|---|---|---|---|---|---|---|---|---|---|
| Enqvist et al. 2010 [19]            | Y | Y | Y | Y | Y | U | N | Y | Y | Y | 8 |
| Fudge et al. 2006 [20]              | Y | Y | Y | Y | Y | U | N | Y | Y | Y | 8 |
| Fudge et al. 2008 [21]              | Y | Y | Y | Y | Y | U | N | Y | Y | Y | 8 |
| Garcia-Roves et al. 1998 [22]       | Y | Y | Y | Y | Y | U | N | Y | Y | Y | 8 |
| Garcia-Roves et al. 2000 [23]       | Y | Y | Y | Y | Y | U | N | Y | Y | Y | 8 |
| Gorsuch & Long 2013 [24]            | Y | Y | Y | Y | Y | U | N | Y | Y | Y | 8 |
| Griffith et al. 1990 [25]           | Y | Y | Y | Y | Y | U | N | Y | Y | Y | 8 |
| Hassapidou & Manstrantoni 2001 [26] | Y | Y | Y | Y | Y | U | N | Y | U | Y | 7 |
| Havemann & Goedecke 2008 [27]       | Y | Y | Y | Y | Y | U | N | Y | Y | Y | 8 |
| Heinonen et al. 1993 [28]           | Y | Y | Y | Y | Y | U | N | Y | Y | Y | 8 |
| Herring et al. 1992 [29]            | Y | Y | Y | Y | Y | U | N | Y | Y | Y | 9 |
| Hill & Davies 2002 [30]             | Y | Y | Y | Y | Y | U | N | Y | Y | Y | 9 |
| Hulton et al. 2010 [31]             | Y | Y | Y | Y | Y | U | N | Y | Y | Y | 9 |
| Jensen et al. 1992 [32]             | Y | Y | N | Y | Y | U | N | Y | Y | Y | 8 |
| Jones & Leitch 1993 [33]            | Y | Y | Y | Y | Y | U | N | Y | Y | Y | 8 |
| Jurimae et al. 1999 [34]            | Y | Y | Y | Y | Y | U | N | Y | Y | Y | 8 |
| Jurimae et al. 2006 [35]            | Y | Y | Y | Y | Y | U | N | Y | Y | Y | 8 |
| Jurimae & Jurimae 2004 [36]         | Y | Y | Y | Y | Y | U | N | Y | Y | Y | 8 |
| Jurimae et al. 2007 [37]            | Y | Y | Y | Y | Y | U | N | Y | Y | Y | 8 |
| Jurimae et al. 2011 [38]            | Y | Y | Y | Y | Y | U | N | Y | Y | Y | 8 |
| Kabasakalis et al. 2007 [39]        | Y | Y | Y | Y | Y | U | N | Y | Y | Y | 8 |
| Koshimizu et al. 2012 [40]          | Y | Y | Y | Y | Y | U | N | Y | Y | Y | 8 |
| LaForgia et al. 1999 [41]           | Y | Y | Y | Y | Y | U | N | Y | Y | Y | 8 |
| Lazzer et al. 2012 [42]             | Y | Y | Y | Y | Y | U | N | Y | Y | Y | 8 |
| Loftin et al. 1992 [43]             | Y | Y | Y | Y | Y | U | N | Y | Y | Y | 8 |
| Maestu et al. 2010 [44]             | Y | Y | Y | Y | Y | U | N | Y | Y | Y | 8 |
| Maïmoun et al. 2003 [45]            | Y | Y | Y | Y | Y | U | N | Y | Y | Y | 8 |
| Magkos et al. 2007 [46]             | Y | Y | Y | Y | Y | U | N | Y | Y | Y | 8 |
| Margaritis et al. 2003 [47]         | Y | Y | Y | Y | Y | U | N | Y | Y | Y | 8 |

|                                |   |   |   |   |   |   |   |   |   |   |   |
|--------------------------------|---|---|---|---|---|---|---|---|---|---|---|
| Martin et al. 2002 [48]        | Y | Y | Y | Y | Y | U | N | Y | Y | Y | 8 |
| Medelli et al. 2009 [49]       | Y | N | Y | Y | Y | U | N | Y | Y | Y | 7 |
| Moses & Manore 1991 [50]       | Y | Y | Y | Y | Y | U | N | Y | Y | Y | 8 |
| Motonaga et al. 2006 [51]      | Y | Y | Y | Y | Y | U | N | Y | Y | Y | 8 |
| Muoio et al. 1994 [52]         | Y | Y | Y | Y | Y | U | N | Y | Y | Y | 8 |
| Noland et al. 2001 [53]        | Y | Y | Y | N | Y | U | N | Y | Y | Y | 7 |
| Ousley-Pahnke et al. 2001 [54] | N | Y | Y | Y | Y | U | N | Y | Y | Y | 7 |
| Palazzetti et al. 2004 [55]    | Y | Y | Y | Y | Y | U | N | Y | Y | Y | 8 |
| Palm et al. 2005 [56]          | Y | Y | Y | Y | Y | U | N | Y | Y | Y | 8 |
| Papadopoulou et al. 2012 [57]  | Y | Y | Y | Y | Y | U | N | Y | Y | Y | 8 |
| Penteado et al. 2010 [58]      | Y | Y | Y | Y | Y | Y | N | Y | Y | Y | 9 |
| Peters & Goetzsche 1997 [59]   | Y | Y | Y | Y | Y | U | N | Y | Y | Y | 8 |
| Phillips et al. 1993 [60]      | Y | Y | Y | Y | Y | U | N | Y | Y | Y | 8 |
| Rehrer et al. 2010 [61]        | Y | Y | Y | Y | Y | U | N | Y | Y | Y | 8 |
| Roberts & Smith 1992 [62]      | Y | Y | Y | Y | Y | U | N | Y | Y | Y | 8 |
| Santos et al. 2014 [63]        | Y | Y | Y | Y | Y | U | N | Y | Y | Y | 8 |
| Sato et al. 2011 [64]          | Y | Y | Y | Y | Y | Y | N | Y | Y | Y | 9 |
| Schena et al. 1995 [65]        | Y | Y | Y | Y | Y | U | N | Y | Y | Y | 8 |
| Schenk et al. 2010 [66]        | Y | Y | Y | Y | Y | U | N | Y | Y | Y | 8 |
| Schulz et al. 1992 [67]        | Y | Y | Y | Y | Y | U | N | Y | Y | Y | 8 |
| Sherman et al. 1993 [68]       | Y | N | Y | Y | Y | U | N | Y | Y | Y | 7 |
| Siders et al. 1991 [69]        | Y | Y | Y | Y | Y | U | N | Y | Y | Y | 8 |
| Siders et al. 1993 [70]        | Y | Y | Y | Y | Y | U | N | Y | Y | Y | 8 |
| Simsch et al. 2002 [71]        | Y | N | Y | Y | Y | U | N | Y | Y | Y | 7 |
| Sjodin et al. 1994 [72]        | Y | Y | Y | Y | Y | U | N | Y | Y | Y | 8 |
| Sundby & Gorelick 2014 [73]    | Y | Y | Y | Y | Y | U | N | Y | Y | Y | 8 |
| Taylor et al. 1997 [74]        | Y | Y | Y | Y | Y | U | N | Y | Y | Y | 8 |
| Tomten & Hostmark 2006 [75]    | Y | Y | Y | Y | Y | U | N | Y | Y | Y | 8 |
| Trappe et al. 1997 [76]        | Y | Y | Y | Y | Y | U | N | Y | Y | Y | 8 |

|                           |   |   |   |   |   |   |   |   |   |   |   |
|---------------------------|---|---|---|---|---|---|---|---|---|---|---|
| Vaiksaar et al. 2011 [77] | Y | Y | Y | Y | Y | U | N | Y | Y | Y | 8 |
| Winters et al. 1996 [78]  | Y | Y | Y | Y | Y | U | N | Y | Y | Y | 8 |
| Witard et al. 2011 [79]   | Y | Y | Y | Y | Y | U | N | Y | Y | Y | 8 |
| Yeater et al. 1996 [80]   | Y | Y | Y | Y | Y | U | N | Y | Y | Y | 8 |
| Zajac et al. 2014 [81]    | Y | Y | Y | Y | Y | U | N | Y | Y | Y | 8 |
| Zalcman et al. 2007 [82]  | Y | Y | Y | Y | Y | U | N | Y | Y | Y | 8 |

\*Numbers in this row refer to the question number in the Downs and Black scale [83]. The questions appear below. Y = yes, N = no, U = unable to determine.

*1 = Is the hypothesis/aim/objective of the study clearly described?*

*2 = Are the main outcomes to be measured clearly described in the Introduction or Methods section?*

*3 = Are the characteristics of the patients included in the study clearly described?*

*6 = Are the main findings of the study clearly described?*

*7 = Does the study provide estimates of the random variability in the data for the main outcomes?*

*11 = Were the subjects asked to participate in the study representative of the entire population from which they were recruited?*

*12 = Were those subjects who were prepared to participate representative of the entire population from which they were recruited?*

*16 = If any of the results of the study were based on “data dredging”, was this made clear?*

*18 = Were the statistical tests used to assess the main outcomes appropriate?*

*20 = Were the main outcome measures used accurate (valid and reliable)?*

## References

1. Armstrong LE, Casa DJ, Emmanuel H, Ganio MS, Klau JF, Lee EC et al. Nutritional, physiological, and perceptual responses during a summer ultraendurance cycling event. *J Strength Cond Res.* 2012;26(2):307-18.
2. Barr SI, Costill DL. Effect of increased training volume on nutrient intake of male collegiate swimmers. *Int J Sports Med.* 1992;13(1):47-51.
3. Bembien DA, Buchanan TD, Bembien MG, Knehans AW. Influence of type of mechanical loading, menstrual status, and training season on bone density in young women athletes. *J Strength Cond Res.* 2004;18(2):220-6.
4. Berg U, Enqvist JK, Mattsson CM, Carlsson-Skwirut C, Sundberg CJ, Ekblom B et al. Lack of sex differences in the IGF-IGFBP response to ultra endurance exercise. *Scand J Med Sci Sports.* 2008;18(6):706-14.
5. Bescós R, Rodríguez FA, Iglesias X, Knechtle B, Benítez A, Marina M et al. Nutritional behavior of cyclists during a 24-hour team relay race: a field study report. *Journal of the International Society of Sports Nutrition.* 2012;9(1):1-11.
6. Boulay MR, Serresse O, Almeras N, Tremblay A. Energy expenditure measurement in male cross-country skiers: comparison of two field methods. *Med Sci Sports Exerc.* 1994;26(2):248-53.
7. Brewer CP, Dawson B, Wallman KE, Guelfi KJ. Effect of Repeated Sodium Phosphate Loading on Cycling Time-Trial Performance and VO<sub>2</sub>peak. *Int J Sport Nutr Exerc Metab.* 2013;23(2):187-94.
8. Brinkworth GD, Buckley JD, Bourdon PC, Gulbin JP, David A. Oral bovine colostrum supplementation enhances buffer capacity but not rowing performance in elite female rowers. *Int J Sport Nutr Exerc Metab.* 2002;12(3):349-65.
9. Carbuhn AF, Fernandez TE, Bragg AF, Green JS, Crouse SF. Sport and training influence bone and body composition in women collegiate athletes. *J Strength Cond Res.* 2010;24(7):1710-7.
10. Costa RJ, Gill SK, Hankey J, Wright A, Marczak S. Perturbed energy balance and hydration status in ultra-endurance runners during a 24 h ultra-marathon. *Br J Nutr.* 2014;112(3):428-37.
11. Couzy F, Lafargue P, Guezennec CY. Zinc metabolism in the athlete: influence of training, nutrition and other factors. *Int J Sports Med.* 1990;11(4):263-6.
12. Decombaz J, Gmuender B, Sierro G, Cerretelli P. Muscle carnitine after strenuous endurance exercise. *J Appl Physiol.* 1992;72(2):423-7.
13. Dellavalle DM, Haas JD. Iron Supplementation Improves Energetic Efficiency in Iron-Depleted Female Rowers. *Med Sci Sports Exerc.* 2014;46(6):1204-15.
14. Desgorces FD, Chennaoui M, Gomez-Merino D, Drogou C, Guezennec CY. Leptin response to acute prolonged exercise after training in rowers. *Eur J Appl Physiol.* 2004;91(5-6):677-81.
15. Desgorces FD, Chennaoui M, Drogou C, Guezennec CY, Gomez-Merino D. Relationships between leptin levels and carbohydrate intake during rowing training. *J Sports Med Phys Fitness.* 2008;48(1):83-9.
16. Drenowatz C, Eisenmann JC, Carlson JJ, Pfeiffer KA, Pivarnik JM. Energy expenditure and dietary intake during high-volume and low-volume training periods among male endurance athletes. *Appl Physiol Nutr Metab.* 2012;37(2):199-205.

17. Drenowatz C, Eisenmann JC, Pivarnik JM, Pfeiffer KA, Carlson JJ. Differences in energy expenditure between high- and low-volume training. *Eur J Sport Sci.* 2013;13(4):422-30.
18. Emhoff CA, Messonnier LA, Horning MA, Fattor JA, Carlson TJ, Brooks GA. Gluconeogenesis and hepatic glycogenolysis during exercise at the lactate threshold. *J Appl Physiol.* 2013;114(3):297-306.
19. Enqvist JK, Mattsson CM, Johansson PH, Brink-Elfegoun T, Bakkman L, Ekblom BT. Energy turnover during 24 hours and 6 days of adventure racing. *J Sports Sci.* 2010;28(9):947-55.
20. Fudge BW, Westerterp KR, Kiplamai FK, Onywera VO, Boit MK, Kayser B et al. Evidence of negative energy balance using doubly labelled water in elite Kenyan endurance runners prior to competition. *Br J Nutr.* 2006;95(1):59-66.
21. Fudge BW, Easton C, Kingsmore D, Kiplamai FK, Onywera VO, Westerterp KR et al. Elite Kenyan Endurance Runners are Hydrated Day-To-Day with Ad Libitum Fluid Intake. *Med Sci Sports Exerc.* 2008;40(6):1171-9.
22. Garcia-Roves PM, Terrados N, Fernandez SF, Patterson AM. Macronutrients intake of top level cyclists during continuous competition--change in the feeding pattern. *Int J Sports Med.* 1998;19(1):61-7.
23. Garcia-Roves PM, Terrados N, Fernandez S, Patterson AM. Comparison of dietary intake and eating behavior of professional road cyclists during training and competition. *Int J Sport Nutr Exerc Metab.* 2000;10(1):82-98.
24. Gorsuch J, Long J, Miller K, Primeau K, Rutledge S, Sossong A et al. The effect of squat depth on multiarticular muscle activation in collegiate cross-country runners. *J Strength Cond Res.* 2013;27(9):2619-25.
25. Griffith RO, Dressendorfer RH, Fullbright GD, Wade CE. Testicular function during exhaustive endurance training. / La fonction testiculaire lors d ' un entraînement épuisant d ' endurance. *Phys Sportsmed.* 1990;18(5):54-6;61-2;4.
26. Hassapidou MN, Manstrantoni A. Dietary intakes of elite female athletes in Greece. *J Hum Nutr Dietetics.* 2001;14(5):391-6.
27. Havemann L, Goedecke JH. Nutritional practices of male cyclists before and during an ultraendurance event. *Int J Sport Nutr Exerc Metab.* 2008;18(6):551-66.
28. Heinonen A, Oja P, Kannus P, Sievanen H, Manttari A, Vuori I. Bone mineral density of female athletes in different sports. *Bone Miner.* 1993;23(1):1-14.
29. Herring JL, Mole PA, Meredith CN, Stern JS. Effect of suspending exercise training on resting metabolic rate in women. *Med Sci Sports Exerc.* 1992;24(1):59-65.
30. Hill RJ, Davies PS. Energy intake and energy expenditure in elite lightweight female rowers. *Med Sci Sports Exerc.* 2002;34(11):1823-9.
31. Hulton AT, Lahart I, Williams KL, Godfrey R, Charlesworth S, Wilson M et al. Energy expenditure in the Race Across America (RAAM). *Int J Sports Med.* 2010;31(7):463-7.
32. Jensen CD, Zaltas ES, Whittam JH. Dietary intakes of male endurance cyclists during training and racing. *J Am Diet Assoc.* 1992;92(8):986-8.
33. Jones PJ, Leitch CA. Validation of doubly labeled water for measurement of caloric expenditure in collegiate swimmers. *J Appl Physiol.* 1993;74(6):2909-14.

34. Jurimae J, Jurimae T, Pihl E. Rowing ergometer performance and anaerobic capacity in college rowers. *Kinesiology*. 1999;31(2):13-8.
35. Jurimae J, Hofmann P, Jurimae T, Maestu J, Purge P, Wonisch M et al. Plasma adiponectin response to sculling exercise at individual anaerobic threshold in college level male rowers. *Int J Sports Med*. 2006;27(4):272-7.
36. Jurimae J, Jurimae T. Plasma leptin responses to prolonged sculling in female rowers. *J Sports Med Phys Fitness*. 2004;44(1):104-9.
37. Jurimae J, Purge P, Jurimae T. Effect of prolonged training period on plasma adiponectin in elite male rowers. *Horm Metab Res*. 2007;39(7):519-23.
38. Jurimae J, Ramson R, Maestu J, Jurimae T, Arciero PJ, Braun WA et al. Interactions between adipose, bone, and muscle tissue markers during acute negative energy balance in male rowers. *J Sports Med Phys Fitness*. 2011;51(2):347-54.
39. Kabasakalis A, Kalitsis K, Tsalis G, Mougios V. Imbalanced nutrition of top-level swimmers. *Int J Sports Med*. 2007;28(9):780-6.
40. Koshimizu T, Matsushima Y, Yokota Y, Yanagisawa K, Nagai S, Okamura K et al. Basal metabolic rate and body composition of elite Japanese male athletes. *J Med Invest*. 2012;59(3-4):253-60.
41. LaForgia J, Withers RT, Williams AD, Murch BJ, Chatterton BE, Schultz CG et al. Effect of 3 weeks of detraining on the resting metabolic rate and body composition of trained males. *Eur J Clin Nutr*. 1999;53(2):126-33.
42. Lazzer S, Salvadego D, Rejc E, Buglione A, Antonutto G, di Prampero PE. The energetics of ultra-endurance running. *Eur J Appl Physiol*. 2012;112(5):1709-15.
43. Loftin M, Warren B, Mayhew J. Comparison of physiologic and performance variables in male and female cross-country runners during a competitive season. *Sports Med Train Rehabil*. 1992;3(4):281-8.
44. Maestu J, Jurimae J, Purge P, Ramson R, Jurimae T. Performance improvement is associated with higher postexercise responses in interleukin-6 and tumor necrosis factor concentrations. *J Sports Med Phys Fitness*. 2010;50(4):524-9.
45. Maïmoun, Lumbroso, Manetta, Paris, Leroux, Sultan. Testosterone is significantly reduced in endurance athletes without impact on bone mineral density. *Horm Res*. 2003;59(6):285-92.
46. Magkos F, Yannakoulia M, Kavouras SA, Sidossis LS. The type and intensity of exercise have independent and additive effects on bone mineral density. *Int J Sports Med*. 2007;28(9):773-9.
47. Margaritis I, Palazzetti S, Rousseau AS, Richard MJ, Favier A. Antioxidant supplementation and tapering exercise improve exercise-induced antioxidant response. *J Am Coll Nutr*. 2003;22(2):147-56.
48. Martin MK, Martin DT, Collier GR, Burke LM. Voluntary food intake by elite female cyclists during training and racing: influence of daily energy expenditure and body composition. *Int J Sport Nutr Exerc Metab*. 2002;12(3):249.
49. Medelli J, Lounana J, Menuet JJ, Shabani M, Cordero-MacIntyre Z. Is osteopenia a health risk in professional cyclists? *J Clin Densitom*. 2009;12(1):28-34.

50. Moses K, Manore MM. Development and testing of a carbohydrate monitoring tool for athletes. *J Am Diet Assoc.* 1991;91(8):962-5.
51. Motonaga K, Yoshida S, Yamagami F, Kawano T, Takeda E. Estimation of total daily energy expenditure and its components by monitoring the heart rate of Japanese endurance athletes. *J Nutr Sci Vitaminol (Tokyo).* 2006;52(5):360-7.
52. Muoio DM, Leddy JJ, Horvath PJ, Awad AB, Pendergast DR. Effect of dietary fat on metabolic adjustments to maximal VO<sub>2</sub> and endurance in runners. *Med Sci Sports Exerc.* 1994;26(1):81-8.
53. Noland RC, Baker JT, Boudreau SR, Kobe RW, Tanner CJ, Hickner RC et al. Effect of intense training on plasma leptin in male and female swimmers. *Med Sci Sports Exerc.* 2001;33(2):227-31.
54. Ousley-Pahnke L, Black DR, Gretebeck RJ. Dietary intake and energy expenditure of female collegiate swimmers during decreased training prior to competition. *J Am Diet Assoc.* 2001;101(3):351-4.
55. Palazzetti S, Rousseau AS, Richard MJ, Favier A, Margaritis I. Antioxidant supplementation preserves antioxidant response in physical training and low antioxidant intake. *Br J Nutr.* 2004;91(1):91-100.
56. Palm R, Jürimäe J, Mästu J, Purge P, Jürimäe T, Rom K et al. Relationship between body composition and aerobic capacity values in well-trained male rowers. *Acta Kinesiol Universitatis Tartu.* 2005;10:125-32.
57. Papadopoulou SK, Gouvianaki A, Grammatikopoulou MG, Maraki Z, Pagkalos IG, Malliaropoulos N et al. Body composition and dietary intake of elite cross-country skiers members of the greek national team. *Asian J Sports Med.* 2012;3(4):257-66.
58. Penteado VS, Castro CH, Pinheiro Mde M, Santana M, Bertolino S, de Mello MT et al. Diet, body composition, and bone mass in well-trained cyclists. *J Clin Densitom.* 2010;13(1):43-50.
59. Peters EM, Goetzsche JM. Dietary practices of South African ultradistance runners. *Int J Sport Nutr.* 1997;7(2):80-103.
60. Phillips SM, Atkinson SA, Tarnopolsky MA, MacDougall JD. Gender differences in leucine kinetics and nitrogen balance in endurance athletes. *J Appl Physiol (1985).* 1993;75(5):2134-41.
61. Rehrer NJ, Hellemans IJ, Rolleston AK, Rush E, Miller BF. Energy intake and expenditure during a 6-day cycling stage race. *Scand J Med Sci Sports.* 2010;20(4):609-18.
62. Roberts D, Smith DJ. Training at moderate altitude: iron status of elite male swimmers. *J Lab Clin Med.* 1992;120(3):387-91.
63. Santos DA, Dawson JA, Matias CN, Rocha PM, Minderico CS, Allison DB et al. Reference values for body composition and anthropometric measurements in athletes. *PLoS One.* 2014;9(5):e97846.
64. Sato A, Shimoyama Y, Ishikawa T, Murayama N. Dietary thiamin and riboflavin intake and blood thiamin and riboflavin concentrations in college swimmers undergoing intensive training. *Int J Sport Nutr Exerc Metab.* 2011;21(3):195-204.
65. Schena F, Pattini A, Mantovanelli S. Iron status in athletes involved in endurance and in prevalently anaerobic sports. In: Kies CV, Driskell JA, editors. *Sports nutrition: minerals and electrolytes.* Boca Raton, FL: CRC Press; 1995. p. 65-80.

66. Schenk K, Gatterer H, Ferrari M, Ferrari P, Cascio VL, Burtscher M. Bike Transalp 2008: liquid intake and its effect on the body's fluid homeostasis in the course of a multistage, cross-country, MTB marathon race in the central Alps. *Clin J Sport Med.* 2010;20(1):47-52.
67. Schulz LO, Alger S, Harper I, Wilmore JH, Ravussin E. Energy expenditure of elite female runners measured by respiratory chamber and doubly labeled water. *J Appl Physiol.* 1992;72(1):23-8.
68. Sherman WM, Doyle JA, Lamb DR, Strauss RH. Dietary carbohydrate, muscle glycogen, and exercise performance during 7 d of training. *Am J Clin Nutr.* 1993;57(1):27-31.
69. Siders WA, Bolonchuk WW, Lukaski HC. Effects of participation in a collegiate sport season on body composition. *J Sports Med Phys Fitness.* 1991;31(4):571-6.
70. Siders WA, Lukaski HC, Bolonchuk WW. Relationships among swimming performance, body composition and somatotype in competitive collegiate swimmers. *J Sports Med Phys Fitness.* 1993;33(2):166-71.
71. Simsch C, Lormes W, Petersen KG, Baur S, Liu Y, Hackney AC et al. Training intensity influences leptin and thyroid hormones in highly trained rowers. *Int J Sports Med.* 2002;23(6):422-7.
72. Sjodin AM, Andersson AB, Hogberg JM, Westerterp KR. Energy balance in cross-country skiers: a study using doubly labeled water. *Med Sci Sports Exerc.* 1994;26(6):720-4.
73. Sundby OH, S. Gorelick ML. Relationship between functional hamstring: quadriceps ratios and running economy in highly trained and recreational female runners. *J Strength Cond Res.* 2014;28(8):2214-27.
74. Taylor SR, Rogers GG, Driver HS. Effects of training volume on sleep, psychological, and selected physiological profiles of elite female swimmers. *Med Sci Sports Exerc.* 1997;29(5):688-93.
75. Tomten SE, Hostmark AT. Energy balance in weight stable athletes with and without menstrual disorders. *Scand J Med Sci Sports.* 2006;16(2):127-33.
76. Trappe TA, Gastaldelli A, Jozsi AC, Troup JP, Wolfe RR. Energy expenditure of swimmers during high volume training. *Med Sci Sports Exerc.* 1997;29(7):950-4.
77. Vaiksaar S, Jurimae J, Maestu J, Purge P, Kalytka S, Shakhlina L et al. No effect of menstrual cycle phase on fuel oxidation during exercise in rowers. *Eur J Appl Physiol.* 2011;111(6):1027-34.
78. Winters KM, Adams WC, Meredith CN, Loan MD, Lasley BL. Bone density and cyclic ovarian function in trained runners and active controls. *Med Sci Sports Exerc.* 1996;28(7):776-85.
79. Witard OC, Jackman SR, Kies AK, Jeukendrup AE, Tipton KD. Effect of increased dietary protein on tolerance to intensified training. *Med Sci Sports Exerc.* 2011;43(4):598-607.
80. Yeater R, Reed C, Ullrich I, Morise A, Borsch M. Resistance trained athletes using or not using anabolic steroids compared to runners: effects on cardiorespiratory variables, body composition, and plasma lipids. *Br J Sports Med.* 1996;30(1):11-4.
81. Zajac A, Poprzecki S, Maszczyk A, Czuba M, Michalczyk M, Zydek G. The effects of a ketogenic diet on exercise metabolism and physical performance in off-road cyclists. *Nutrients.* 2014;6(7):2493-508.
82. Zalzman I, Guarita HV, Juzwiak CR, Crispim CA, Antunes HK, Edwards B et al. Nutritional status of adventure racers. *Nutrition.* 2007;23(5):404-11.

83. Downs SH, Black N. The feasibility of creating a checklist for the assessment of the methodological quality both of randomised and non-randomised studies of health care interventions. *J Epidemiol Community Health*. 1998;52(6):377-84.
